# Supplementary material
Source: MDPI journal article supplement (https://www.mdpi.com/2079-3200/4/1/5)
Supplement: s1 [file s1]

## Sheet: Correlations intelligence tests
Table S1. Correlations among the twelve intelligence (sub)tests and factor scores of psychometric g as well as factor scores of the memory composite (for more details see method and results sections in the manuscript).
		LPS 1	LPS 5	LPS 7	LPS 9	LPS 10	LPS 14	CFT	BIS XG	BIS SC	BIS WM	BIS ZZ	BIS OG	Psychometric g	Memory composite
LPS 1	Pearson Correlation	1	0.604749	0.260046	0.220668	0.302757	0.33146	0.257834	0.474795	0.353256	0.31634	0.172636	0.0917585	0.633007	0.278676
	Sig. (2-tailed)		7.9641e-26	3.77787e-05	0.000502665	1.37594e-06	1.08085e-07	4.41961e-05	3.52496e-15	1.30495e-08	4.26727e-07	0.00675407	0.152165	7.7381e-29	9.5246e-06
	N	245	245	245	245	245	245	245	245	245	245	245	245	245	245
LPS 5	Pearson Correlation	0.604749	1	0.290986	0.349287	0.31079	0.402769	0.344241	0.390421	0.324043	0.215865	0.143547	0.174874	0.668656	0.251136
	Sig. (2-tailed)	7.9641e-26		3.62192e-06	1.94128e-08	6.9335e-07	5.6886e-11	3.19079e-08	2.40562e-10	2.13979e-07	0.000669577	0.024638	0.00606217	4.10077e-33	7.0472e-05
	N	245	245	245	245	245	245	245	245	245	245	245	245	245	245
LPS 7	Pearson Correlation	0.260046	0.290986	1	0.373945	0.357292	0.389742	0.306091	0.383894	0.281291	0.10022	0.112973	0.195484	0.59055	0.188633
	Sig. (2-tailed)	3.77787e-05	3.62192e-06		1.50412e-09	8.66515e-09	2.59971e-10	1.03786e-06	5.0338e-10	7.7859e-06	0.117676	0.077577	0.002113	2.01664e-24	0.00303541
	N	245	245	245	245	245	245	245	245	245	245	245	245	245	245
LPS 9	Pearson Correlation	0.220668	0.349287	0.373945	1	0.607195	0.312529	0.54603	0.279803	0.381719	0.0951137	0.127587	0.359478	0.69071	0.263837
	Sig. (2-tailed)	0.000502665	1.94128e-08	1.50412e-09		4.49009e-26	5.96183e-07	1.93279e-20	8.73418e-06	6.41508e-10	0.137671	0.046042	6.92474e-09	4.54223e-36	2.87761e-05
	N	245	245	245	245	245	245	245	245	245	245	245	245	245	245
LPS 10	Pearson Correlation	0.302757	0.31079	0.357292	0.607195	1	0.325211	0.46565	0.20779	0.36939	0.150211	0.121397	0.329475	0.669539	0.274668
	Sig. (2-tailed)	1.37594e-06	6.9335e-07	8.66515e-09	4.49009e-26		1.9239e-07	1.37397e-14	0.00106947	2.45261e-09	0.0186469	0.0577656	1.29993e-07	3.15755e-33	1.29218e-05
	N	245	245	245	245	245	245	245	245	245	245	245	245	245	245
LPS 14	Pearson Correlation	0.33146	0.402769	0.389742	0.312529	0.325211	1	0.259196	0.533851	0.329876	0.216121	0.193473	0.178194	0.649151	0.277405
	Sig. (2-tailed)	1.08085e-07	5.6886e-11	2.59971e-10	5.96183e-07	1.9239e-07		4.01339e-05	1.88522e-19	1.25251e-07	0.000659555	0.00235301	0.00515268	1.05491e-30	1.0498e-05
	N	245	245	245	245	245	245	245	245	245	245	245	245	245	245
CFT	Pearson Correlation	0.257834	0.344241	0.306091	0.54603	0.46565	0.259196	1	0.306301	0.42156	-0.00706822	0.178144	0.373333	0.659883	0.245146
	Sig. (2-tailed)	4.41961e-05	3.19079e-08	1.03786e-06	1.93279e-20	1.37397e-14	4.01339e-05		1.01946e-06	5.6408e-12	0.912353	0.00516526	1.60693e-09	5.23894e-32	0.000105821
	N	245	245	245	245	245	245	245	245	245	245	245	245	245	245
BIS XG	Pearson Correlation	0.474795	0.390421	0.383894	0.279803	0.20779	0.533851	0.306301	1	0.465104	0.121018	0.1992	0.0564465	0.652954	0.181706
	Sig. (2-tailed)	3.52496e-15	2.40562e-10	5.0338e-10	8.73418e-06	0.00106947	1.88522e-19	1.01946e-06		1.48831e-14	0.0585573	0.00172738	0.379016	3.691e-31	0.00432554
	N	245	245	245	245	245	245	245	245	245	245	245	245	245	245
BIS SC	Pearson Correlation	0.353256	0.324043	0.281291	0.381719	0.36939	0.329876	0.42156	0.465104	1	0.0536918	0.15478	0.110398	0.63302	0.15016
	Sig. (2-tailed)	1.30495e-08	2.13979e-07	7.7859e-06	6.41508e-10	2.45261e-09	1.25251e-07	5.6408e-12	1.48831e-14		0.402752	0.0153113	0.0846286	7.71192e-29	0.0186872
	N	245	245	245	245	245	245	245	245	245	245	245	245	245	245
BIS WM	Pearson Correlation	0.31634	0.215865	0.10022	0.0951137	0.150211	0.216121	-0.00706822	0.121018	0.0536918	1	0.309305	0.211008	0.316596	0.729923
	Sig. (2-tailed)	4.26727e-07	0.000669577	0.117676	0.137671	0.0186469	0.000659555	0.912353	0.0585573	0.402752		7.88207e-07	0.000889259	4.17159e-07	4.89675e-42
	N	245	245	245	245	245	245	245	245	245	245	245	245	245	245
BIS ZZ	Pearson Correlation	0.172636	0.143547	0.112973	0.127587	0.121397	0.193473	0.178144	0.1992	0.15478	0.309305	1	0.227939	0.34535	0.743392
	Sig. (2-tailed)	0.00675407	0.024638	0.077577	0.046042	0.0577656	0.00235301	0.00516526	0.00172738	0.0153113	7.88207e-07		0.000321871	2.86281e-08	2.46493e-44
	N	245	245	245	245	245	245	245	245	245	245	245	245	245	245
BIS OG	Pearson Correlation	0.0917585	0.174874	0.195484	0.359478	0.329475	0.178194	0.373333	0.0564465	0.110398	0.211008	0.227939	1	0.428114	0.645027
	Sig. (2-tailed)	0.152165	0.00606217	0.002113	6.92474e-09	1.29993e-07	0.00515268	1.60693e-09	0.379016	0.0846286	0.000889259	0.000321871		2.43429e-12	3.23908e-30
	N	245	245	245	245	245	245	245	245	245	245	245	245	245	245
Psychometric g	Pearson Correlation	0.633007	0.668656	0.59055	0.69071	0.669539	0.649151	0.659883	0.652954	0.63302	0.316596	0.34535	0.428114	1	0.508809
	Sig. (2-tailed)	7.7381e-29	4.10077e-33	2.01664e-24	4.54223e-36	3.15755e-33	1.05491e-30	5.23894e-32	3.691e-31	7.71192e-29	4.17159e-07	2.86281e-08	2.43429e-12		1.54234e-17
	N	245	245	245	245	245	245	245	245	245	245	245	245	245	245
Memory composite	Pearson Correlation	0.278676	0.251136	0.188633	0.263837	0.274668	0.277405	0.245146	0.181706	0.15016	0.729923	0.743392	0.645027	0.508809	1
	Sig. (2-tailed)	9.5246e-06	7.0472e-05	0.00303541	2.87761e-05	1.29218e-05	1.0498e-05	0.000105821	0.00432554	0.0186872	4.89675e-42	2.46493e-44	3.23908e-30	1.54234e-17
	N	245	245	245	245	245	245	245	245	245	245	245	245	245	245

## Sheet: Correlations RT measures
Table S2. Correlations among RT bands and mean RT across the bands in the three bit conditions of the Hick RT task (for more details see method and results sections in the manuscript).
			0-bit condition							1-bit condition							2-bit condition
			RT band 1	RT band 2	RT band 3	RT band 4	RT band 5	RT band 6	RT across all six bands	RT band 1	RT band 2	RT band 3	RT band 4	RT band 5	RT band 6	RT across all six bands	RT band 1	RT band 2	RT band 3	RT band 4	RT band 5	RT band 6	RT across all six bands
0-bit condition	RT band 1	Pearson Correlation	1	0.960673	0.910055	0.836446	0.707001	0.493499	0.822238	0.59813	0.587933	0.568592	0.530939	0.491024	0.42154	0.54536	0.538252	0.49929	0.473657	0.448812	0.426809	0.36916	0.463768
		Sig. (2-tailed)		3.21956e-137	6.37929e-95	2.08277e-65	1.98657e-38	1.91624e-16	2.04976e-61	3.66462e-25	3.59574e-24	2.20622e-22	3.20619e-19	2.8461e-16	5.65533e-12	2.19591e-20	8.36513e-20	7.4989e-17	4.18462e-15	1.51611e-13	2.88164e-12	2.5133e-09	1.80868e-14
		N	245	245	245	245	245	245	245	245	245	245	245	245	245	245	245	245	245	245	245	245	245
	RT band 2	Pearson Correlation	0.960673	1	0.971422	0.907712	0.785714	0.574843	0.887542	0.607796	0.612701	0.599466	0.564305	0.526264	0.462169	0.57805	0.557704	0.527802	0.507664	0.48666	0.47088	0.422982	0.503701
		Sig. (2-tailed)	3.21956e-137		8.80997e-154	1.25314e-93	1.32776e-52	6.0078e-23	9.47781e-84	3.89716e-26	1.21321e-26	2.70081e-25	5.29943e-22	7.44106e-19	2.28167e-14	3.04861e-23	1.99309e-21	5.64906e-19	1.87027e-17	5.67384e-16	6.3424e-15	4.708e-12	3.62584e-17
		N	245	245	245	245	245	245	245	245	245	245	245	245	245	245	245	245	245	245	245	245	245
	RT band 3	Pearson Correlation	0.910055	0.971422	1	0.967955	0.862538	0.659963	0.937337	0.614538	0.64079	0.64036	0.609417	0.572908	0.515024	0.619797	0.573104	0.549317	0.530292	0.511512	0.502087	0.462262	0.532083
		Sig. (2-tailed)	6.37929e-95	8.80997e-154		7.87224e-148	7.5704e-74	5.12079e-32	2.94376e-113	7.79723e-27	1.00748e-29	1.12926e-29	2.65609e-26	9.01262e-23	5.34644e-18	2.16255e-27	8.6501e-23	1.02858e-20	3.60493e-19	9.75433e-18	4.73568e-17	2.25111e-14	2.60392e-19
		N	245	245	245	245	245	245	245	245	245	245	245	245	245	245	245	245	245	245	245	245	245
	RT band 4	Pearson Correlation	0.836446	0.907712	0.967955	1	0.934525	0.746804	0.966114	0.604111	0.642931	0.655871	0.634647	0.602582	0.553743	0.641305	0.559154	0.547338	0.531235	0.518087	0.514341	0.483854	0.538869
		Sig. (2-tailed)	2.08277e-65	1.25314e-93	7.87224e-148		5.13068e-111	6.12016e-45	6.22299e-145	9.24042e-26	5.69014e-30	1.63292e-31	5.06061e-29	1.3179e-25	4.3515e-21	8.7858e-30	1.49367e-21	1.50509e-20	3.03853e-19	3.14623e-18	6.01258e-18	8.79472e-16	7.45875e-20
		N	245	245	245	245	245	245	245	245	245	245	245	245	245	245	245	245	245	245	245	245	245
	RT band 5	Pearson Correlation	0.707001	0.785714	0.862538	0.934525	1	0.881313	0.968414	0.600004	0.655051	0.680691	0.67187	0.645919	0.599146	0.672952	0.552083	0.546037	0.536877	0.535195	0.534877	0.511907	0.552343
		Sig. (2-tailed)	1.98657e-38	1.32776e-52	7.5704e-74	5.13068e-111		4.46681e-81	1.39804e-148	2.38744e-25	2.05528e-31	1.07674e-34	1.5775e-33	2.54474e-30	2.9057e-25	1.14048e-33	6.01712e-21	1.93014e-20	1.07969e-19	1.47282e-19	1.56159e-19	9.12047e-18	5.72021e-21
		N	245	245	245	245	245	245	245	245	245	245	245	245	245	245	245	245	245	245	245	245	245
	RT band 6	Pearson Correlation	0.493499	0.574843	0.659963	0.746804	0.881313	1	0.870505	0.522326	0.597818	0.648779	0.665444	0.666444	0.634533	0.661877	0.49158	0.508314	0.519116	0.530819	0.540269	0.545922	0.544888
		Sig. (2-tailed)	1.91624e-16	6.0078e-23	5.12079e-32	6.12016e-45	4.46681e-81		8.91744e-77	1.49734e-18	3.93445e-25	1.16811e-30	1.05244e-32	7.85788e-33	5.21284e-29	2.95818e-32	2.60482e-16	1.6765e-17	2.6299e-18	3.27693e-19	5.74186e-20	1.97292e-20	2.40237e-20
		N	245	245	245	245	245	245	245	245	245	245	245	245	245	245	245	245	245	245	245	245	245
	RT across all six bands in the 0-bit condition	Pearson Correlation	0.822238	0.887542	0.937337	0.966114	0.968414	0.870505	1	0.637009	0.683693	0.704379	0.69127	0.66603	0.612881	0.696302	0.58987	0.580529	0.571233	0.56436	0.560965	0.534461	0.583034
		Sig. (2-tailed)	2.04976e-61	9.47781e-84	2.94376e-113	6.22299e-145	1.39804e-148	8.91744e-77		2.73246e-29	4.22645e-35	4.88354e-38	3.79193e-36	8.87095e-33	1.16188e-26	7.33361e-37	2.34454e-24	1.79575e-23	1.27765e-22	5.24071e-22	1.03976e-21	1.68567e-19	1.04698e-23
		N	245	245	245	245	245	245	245	245	245	245	245	245	245	245	245	245	245	245	245	245	245
1-bit condition	RT band 1	Pearson Correlation	0.59813	0.607796	0.614538	0.604111	0.600004	0.522326	0.637009	1	0.956951	0.908757	0.869904	0.798685	0.668204	0.884712	0.712277	0.675794	0.645838	0.631786	0.617494	0.545611	0.649344
		Sig. (2-tailed)	3.66462e-25	3.89716e-26	7.79723e-27	9.24042e-26	2.38744e-25	1.49734e-18	2.73246e-29		1.5168e-132	3.35244e-94	1.50546e-76	1.5969e-55	4.68474e-33	1.62366e-82	3.15482e-39	4.83391e-34	2.6015e-30	1.05977e-28	3.80371e-27	2.0936e-20	1.00037e-30
		N	245	245	245	245	245	245	245	245	245	245	245	245	245	245	245	245	245	245	245	245	245
	RT band 2	Pearson Correlation	0.587933	0.612701	0.64079	0.642931	0.655051	0.597818	0.683693	0.956951	1	0.975549	0.943013	0.883128	0.772854	0.951771	0.73525	0.706393	0.684009	0.677764	0.672585	0.61831	0.69874
		Sig. (2-tailed)	3.59574e-24	1.21321e-26	1.00748e-29	5.69014e-30	2.05528e-31	3.93445e-25	4.22645e-35	1.5168e-132		6.65842e-162	4.08103e-118	7.70481e-82	6.6714e-50	1.09473e-126	6.27878e-43	2.44966e-38	3.82732e-35	2.65142e-34	1.27333e-33	3.11557e-27	3.26829e-37
		N	245	245	245	245	245	245	245	245	245	245	245	245	245	245	245	245	245	245	245	245	245
	RT band 3	Pearson Correlation	0.568592	0.599466	0.64036	0.655871	0.680691	0.648779	0.704379	0.908757	0.975549	1	0.981518	0.935317	0.837734	0.979448	0.733643	0.716585	0.706911	0.706388	0.706051	0.662033	0.725551
		Sig. (2-tailed)	2.20622e-22	2.70081e-25	1.12926e-29	1.63292e-31	1.07674e-34	1.16811e-30	4.88354e-38	3.35244e-94	6.65842e-162		1.62761e-176	1.22677e-111	8.66799e-66	5.74812e-171	1.1727e-42	6.80815e-40	2.04978e-38	2.45417e-38	2.75543e-38	2.82794e-32	2.54862e-41
		N	245	245	245	245	245	245	245	245	245	245	245	245	245	245	245	245	245	245	245	245	245
	RT band 4	Pearson Correlation	0.530939	0.564305	0.609417	0.634647	0.67187	0.665444	0.69127	0.869904	0.943013	0.981518	1	0.96808	0.878964	0.987157	0.706766	0.70336	0.698785	0.706303	0.715958	0.689565	0.727457
		Sig. (2-tailed)	3.20619e-19	5.29943e-22	2.65609e-26	5.06061e-29	1.5775e-33	1.05244e-32	3.79193e-36	1.50546e-76	4.08103e-118	1.62761e-176		4.92195e-148	4.16251e-80	1.41682e-195	2.15468e-38	6.9076e-38	3.21998e-37	2.52664e-38	8.52532e-40	6.56612e-36	1.24648e-41
		N	245	245	245	245	245	245	245	245	245	245	245	245	245	245	245	245	245	245	245	245	245
	RT band 5	Pearson Correlation	0.491024	0.526264	0.572908	0.602582	0.645919	0.666444	0.66603	0.798685	0.883128	0.935317	0.96808	1	0.935843	0.97775	0.667765	0.673837	0.680835	0.69743	0.713466	0.696043	0.714972
		Sig. (2-tailed)	2.8461e-16	7.44106e-19	9.01262e-23	1.3179e-25	2.54474e-30	7.85788e-33	8.87095e-33	1.5969e-55	7.70481e-82	1.22677e-111	4.92195e-148		4.7021e-112	7.99208e-167	5.33182e-33	8.74056e-34	1.02969e-34	5.05168e-37	2.07213e-39	7.98734e-37	1.21269e-39
		N	245	245	245	245	245	245	245	245	245	245	245	245	245	245	245	245	245	245	245	245	245
	RT band 6	Pearson Correlation	0.42154	0.462169	0.515024	0.553743	0.599146	0.634533	0.612881	0.668204	0.772854	0.837734	0.878964	0.935843	1	0.918809	0.60067	0.62829	0.643045	0.657242	0.675999	0.676327	0.675011
		Sig. (2-tailed)	5.65533e-12	2.28167e-14	5.34644e-18	4.3515e-21	2.9057e-25	5.21284e-29	1.16188e-26	4.68474e-33	6.6714e-50	8.66799e-66	4.16251e-80	4.7021e-112		4.35027e-100	2.04863e-25	2.58874e-28	5.51935e-30	1.10918e-31	4.54267e-34	4.11137e-34	6.12984e-34
		N	245	245	245	245	245	245	245	245	245	245	245	245	245	245	245	245	245	245	245	245	245
	RT across all six bands in the 1-bit condition	Pearson Correlation	0.54536	0.57805	0.619797	0.641305	0.672952	0.661877	0.696302	0.884712	0.951771	0.979448	0.987157	0.97775	0.918809	1	0.717749	0.714023	0.709866	0.715287	0.722292	0.690592	0.735169
		Sig. (2-tailed)	2.19591e-20	3.04861e-23	2.16255e-27	8.7858e-30	1.14048e-33	2.95818e-32	7.33361e-37	1.62366e-82	1.09473e-126	5.74812e-171	1.41682e-195	7.99208e-167	4.35027e-100		4.4759e-40	1.70029e-39	7.35176e-39	1.08382e-39	8.53745e-41	4.71911e-36	6.47943e-43
		N	245	245	245	245	245	245	245	245	245	245	245	245	245	245	245	245	245	245	245	245	245
2-bit condition	RT band 1	Pearson Correlation	0.538252	0.557704	0.573104	0.559154	0.552083	0.49158	0.58987	0.712277	0.73525	0.733643	0.706766	0.667765	0.60067	0.717749	1	0.959212	0.926625	0.895967	0.85987	0.776451	0.918986
		Sig. (2-tailed)	8.36513e-20	1.99309e-21	8.6501e-23	1.49367e-21	6.01712e-21	2.60482e-16	2.34454e-24	3.15482e-39	6.27878e-43	1.1727e-42	2.15468e-38	5.33182e-33	2.04863e-25	4.4759e-40		2.48151e-135	3.22681e-105	1.25486e-87	6.59692e-73	1.22178e-50	3.37747e-100
		N	245	245	245	245	245	245	245	245	245	245	245	245	245	245	245	245	245	245	245	245	245
	RT band 2	Pearson Correlation	0.49929	0.527802	0.549317	0.547338	0.546037	0.508314	0.580529	0.675794	0.706393	0.716585	0.70336	0.673837	0.62829	0.714023	0.959212	1	0.979759	0.952267	0.923796	0.849918	0.967893
		Sig. (2-tailed)	7.4989e-17	5.64906e-19	1.02858e-20	1.50509e-20	1.93014e-20	1.6765e-17	1.79575e-23	4.83391e-34	2.44966e-38	6.80815e-40	6.9076e-38	8.74056e-34	2.58874e-28	1.70029e-39	2.48151e-135		9.17577e-172	3.20975e-127	2.68106e-103	1.45033e-69	9.88838e-148
		N	245	245	245	245	245	245	245	245	245	245	245	245	245	245	245	245	245	245	245	245	245
	RT band 3	Pearson Correlation	0.473657	0.507664	0.530292	0.531235	0.536877	0.519116	0.571233	0.645838	0.684009	0.706911	0.698785	0.680835	0.643045	0.709866	0.926625	0.979759	1	0.984682	0.957084	0.887753	0.985224
		Sig. (2-tailed)	4.18462e-15	1.87027e-17	3.60493e-19	3.03853e-19	1.07969e-19	2.6299e-18	1.27765e-22	2.6015e-30	3.82732e-35	2.04978e-38	3.21998e-37	1.02969e-34	5.51935e-30	7.35176e-39	3.22681e-105	9.17577e-172		2.43163e-186	1.04993e-132	7.64636e-84	3.15786e-188
		N	245	245	245	245	245	245	245	245	245	245	245	245	245	245	245	245	245	245	245	245	245
	RT band 4	Pearson Correlation	0.448812	0.48666	0.511512	0.518087	0.535195	0.530819	0.56436	0.631786	0.677764	0.706388	0.706303	0.69743	0.657242	0.715287	0.895967	0.952267	0.984682	1	0.981893	0.917416	0.989535
		Sig. (2-tailed)	1.51611e-13	5.67384e-16	9.75433e-18	3.14623e-18	1.47282e-19	3.27693e-19	5.24071e-22	1.05977e-28	2.65142e-34	2.45417e-38	2.52664e-38	5.05168e-37	1.10918e-31	1.08382e-39	1.25486e-87	3.20975e-127	2.43163e-186		1.37949e-177	3.15104e-99	2.55866e-206
		N	245	245	245	245	245	245	245	245	245	245	245	245	245	245	245	245	245	245	245	245	245
	RT band 5	Pearson Correlation	0.426809	0.47088	0.502087	0.514341	0.534877	0.540269	0.560965	0.617494	0.672585	0.706051	0.715958	0.713466	0.675999	0.722292	0.85987	0.923796	0.957084	0.981893	1	0.952923	0.985366
		Sig. (2-tailed)	2.88164e-12	6.3424e-15	4.73568e-17	6.01258e-18	1.56159e-19	5.74186e-20	1.03976e-21	3.80371e-27	1.27333e-33	2.75543e-38	8.52532e-40	2.07213e-39	4.54267e-34	8.53745e-41	6.59692e-73	2.68106e-103	1.04993e-132	1.37949e-177		6.21594e-128	9.84111e-189
		N	245	245	245	245	245	245	245	245	245	245	245	245	245	245	245	245	245	245	245	245	245
	RT band 6	Pearson Correlation	0.36916	0.422982	0.462262	0.483854	0.511907	0.545922	0.534461	0.545611	0.61831	0.662033	0.689565	0.696043	0.676327	0.690592	0.776451	0.849918	0.887753	0.917416	0.952923	1	0.944121
		Sig. (2-tailed)	2.5133e-09	4.708e-12	2.25111e-14	8.79472e-16	9.12047e-18	1.97292e-20	1.68567e-19	2.0936e-20	3.11557e-27	2.82794e-32	6.56612e-36	7.98734e-37	4.11137e-34	4.71911e-36	1.22178e-50	1.45033e-69	7.64636e-84	3.15104e-99	6.21594e-128		4.01672e-119
		N	245	245	245	245	245	245	245	245	245	245	245	245	245	245	245	245	245	245	245	245	245
	RT across all six bands in the 2-bit condition	Pearson Correlation	0.463768	0.503701	0.532083	0.538869	0.552343	0.544888	0.583034	0.649344	0.69874	0.725551	0.727457	0.714972	0.675011	0.735169	0.918986	0.967893	0.985224	0.989535	0.985366	0.944121	1
		Sig. (2-tailed)	1.80868e-14	3.62584e-17	2.60392e-19	7.45875e-20	5.72021e-21	2.40237e-20	1.04698e-23	1.00037e-30	3.26829e-37	2.54862e-41	1.24648e-41	1.21269e-39	6.12984e-34	6.47943e-43	3.37747e-100	9.88838e-148	3.15786e-188	2.55866e-206	9.84111e-189	4.01672e-119
		N	245	245	245	245	245	245	245	245	245	245	245	245	245	245	245	245	245	245	245	245	245
